# Supplementary material
Source: publisher figshare collection journal article supplement (https://frontiersin.figshare.com/ndownloader/files/39650188)
Supplement: Supplementary file 1 [file 39650188]

Supplementary Material

A Content Validity and Cognitive Interview to Develop the HARMONI Items: Instrument Measuring Student Well-being in West Java Indonesia

**Hery Susanto1, Miryam Wedyaswari1, Karolina Lamtiur Dalimunthe1***

1Center of Psychological Innovation and Research, Faculty of Psychology,
Universitas Padjadjaran, Sumedang, Indonesia

*** Correspondence:**Karolina Lamtiur Dalimunthe
[karolina@unpad.ac.id](mailto:karolina@unpad.ac.id)

Table S2
Items identified as problematic in the cognitive interview

| Number | Item | | Cognitive coding |
| --- | --- | --- | --- |
| English translation | Original wording (Bahasa Indonesia) |
| P5 | I enjoy participating in learning activities that the teacher designed. | *Saya senang mengikuti kegiatan belajar yang dirancang oleh guru.* | CQ |
| P10 | I think there is a lesson that I can take from every obstacle I meet during school. | *Saya beranggapan bahwa ada pembelajaran yang bisa saya ambil di setiap hambatan yang saya temui selama bersekolah.* | CQ |
| R19 | School employees listen to student complaints. | *Pegawai sekolah mendengarkan keluhan siswa.* | CQ, RI |
| O2 | So far, I have achieved a lot of success while studying. | *Sejauh ini saya telah mencapai banyak keberhasilan selama bersekolah.* | CQ |
| O7 | I am disciplined to conduct the plans that I have drawn up. | *Saya disiplin dalam melaksanakan rencana yang telah saya susun.* | RI, JP |
| O8 | I study very hard to get good results. | *Saya belajar dengan maksimal agar mendapatkan hasil yang baik.* | JP |
| O12 | I can maintain the spirit of achieving hope during school. | *Saya mampu mempertahankan semangat dalam mencapai harapan saya selama bersekolah.* | CQ |
| O16 | I can use certain skills to achieve my expectations during school. | *Saya dapat memanfaatkan keterampilan tertentu untuk mencapai harapan saya selama bersekolah.* | RI |
| O17 | I apply many ways to help me achieve my targets during school. | *Saya menerapkan banyak cara untuk membantu saya mencapai target selama bersekolah.* | RI |
| S1 | I recognize my character strength. | *Saya mengenali kekuatan dari karakter diri saya.* | RI, JP |
| S2 | I understand myself. | *Saya memahami diri saya.* | RI |
| S3 | I know my capacity to solve problems well. | *Saya mengetahui dengan baik kapasitas saya untuk menyelesaikan masalah.* | RI |
| S13 | I rarely feel ashamed of my character. | *Saya jarang merasa malu dengan karakter diri saya.* | CQ |
| S15 | I know how to use my strengths in various contexts. | *Saya tahu bagaimana cara memanfaatkan kelebihan saya di berbagai konteks.* | CQ |
| E18 | I took the initiative to invite friends to do activities together | *Saya berinisiatif mengajak teman-teman untuk melakukan kegiatan bersama.* | CQ |
| RE12 | I have alternative ways to overcome the obstacles I experience | *Saya memiliki alternatif cara dalam mengatasi hambatan yang saya alami.* | CQ, RI |

Notes. P=prosper; R=relationships; O=outcomes; S=strengths; PU=purpose; E=engagement; RE=resilience; CQ=comprehension of the question, RI=retrieval of relevant information, JP=judgment process, RP=response process; bold=item with more than one source of problem; underline=item with low I-CVI.
